# Supplementary material for: Individually or as a Team—The Immunological Milieu in the Lung Caused by Migrating Single-Sex or Mixed-Sex Larvae of Schistosoma mansoni
Source: MDPI journal article supplement (doi:10.3390/pathogens12121432), 2023-12-08
Supplement: s1 [file s1]

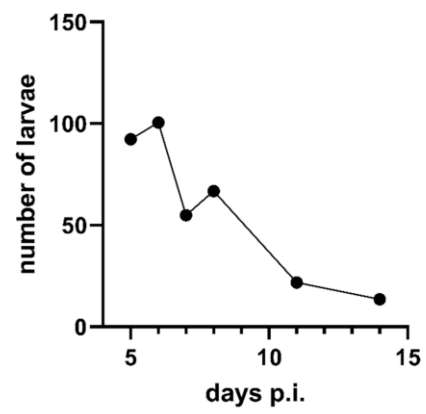

**Supplementary Figure 1.** Number of *Schistosoma mansoni* larvae counted in the mouse lung with peak on day 6 after infection. The mice were infected with 300 male and female cercariae. The data are expressed as mean values, with  $n=5$ .

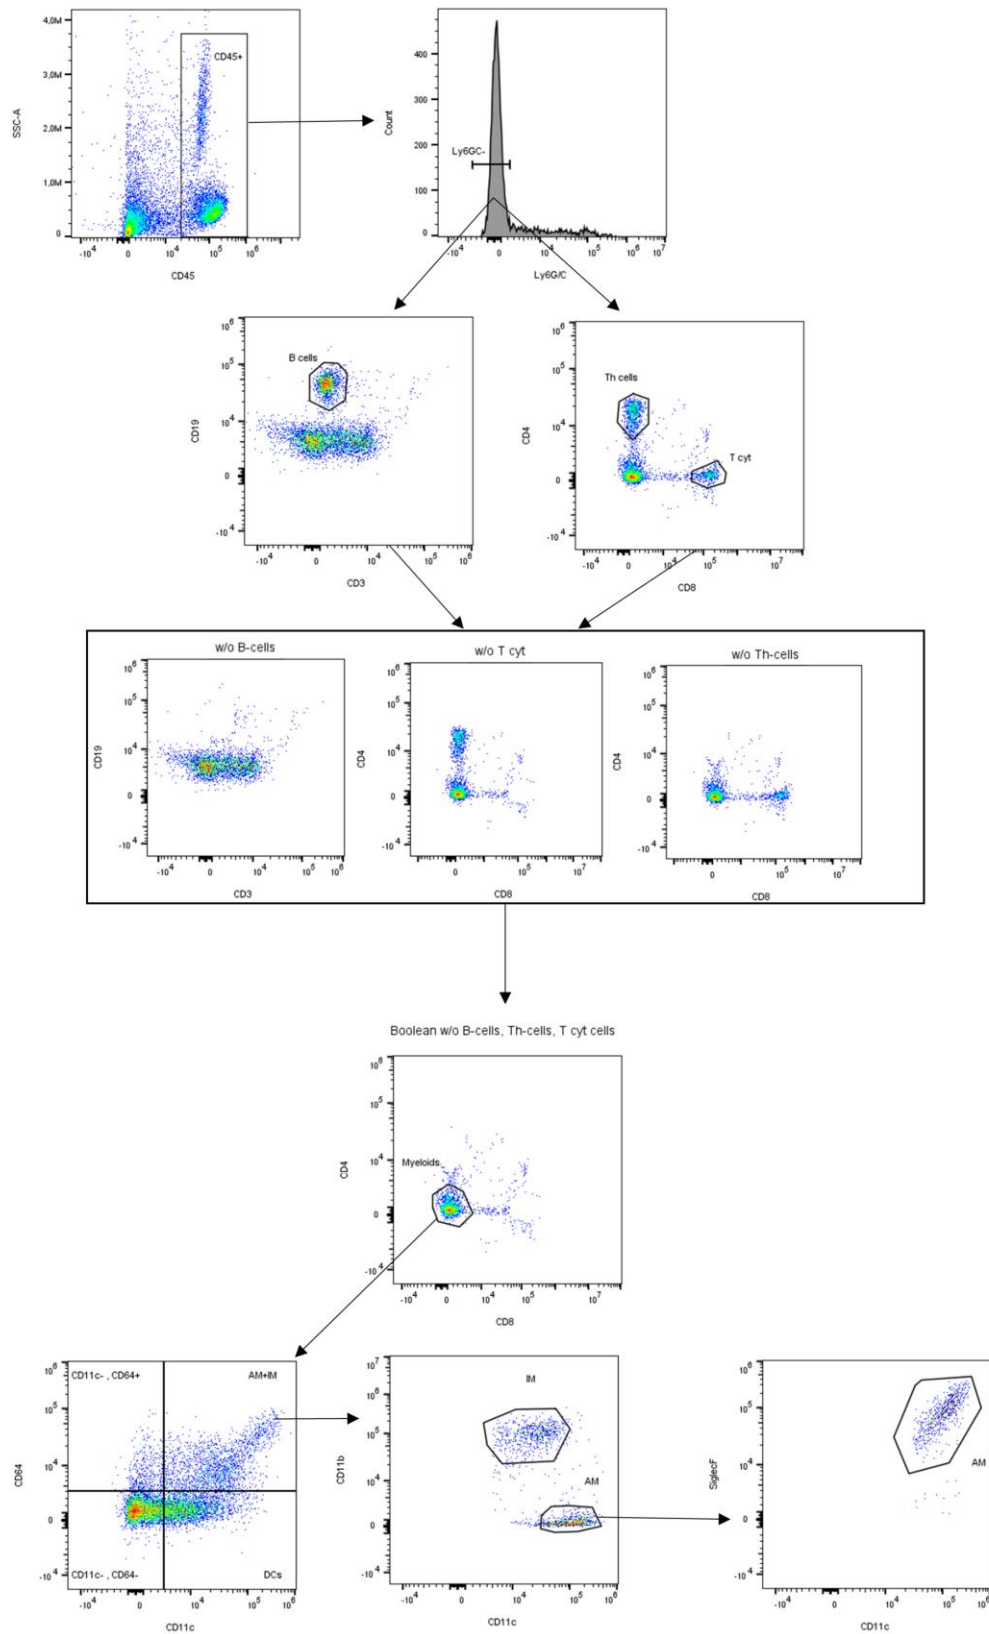

**Supplementary Figure 2.** Gating strategy of lymphoid and myeloid lung cells. T cyt: cytotoxic T cells; Th-cells: T helper cells; Myeloids: myeloid cells; AM: alveolar macrophages; IM: interstitial macrophages; DCs: dendritic cells.

**Supplementary Table 1.** Cytokines and chemokines of female only, male only or male and female *Schistosoma mansoni* infected mice measured in BAL fluids with a Multiplex assay. The data are expressed as mean values, with n=7 for the infected groups and n=6 for the naive control, measured in (pg/ml).

|              | 4 days p.i. |       |             |       | 16 days p.i. |       |             |       |
|--------------|-------------|-------|-------------|-------|--------------|-------|-------------|-------|
| [pg/ml]      | female      | male  | male+female | naive | female       | male  | male+female | naive |
| IL10         | 6,63        | 9,01  | 3,60        | 9,73  | 8,29         | 3,70  | 0,00        | 14,07 |
| IL-1 $\beta$ | 0,00        | 0,00  | 0,12        | 0,16  | 0,00         | 0,86  | 0,78        | 0,14  |
| CXCL1        | 7,28        | 8,61  | 5,75        | 6,70  | 17,11        | 20,51 | 19,99       | 10,57 |
| CXCL2        | 4,88        | 5,77  | 6,07        | 4,72  | 6,44         | 5,94  | 3,33        | 7,11  |
| CXCL10       | 9,08        | 10,32 | 8,32        | 10,15 | 53,08        | 55,55 | 31,66       | 10,37 |
| CCL2         | 38,74       | 40,41 | 42,09       | 55,23 | 53,99        | 49,42 | 84,63       | 43,54 |
| CCL3         | 0,30        | 0,56  | 0,43        | 0,16  | 1,86         | 2,06  | 0,93        | 0,80  |
| CCL4         | 1,50        | 1,83  | 1,56        | 1,76  | 4,05         | 4,46  | 2,77        | 2,46  |
| RANTES       | 0,84        | 0,92  | 2,28        | 3,61  | 10,46        | 10,88 | 11,24       | 5,58  |
